# Supplementary material
Source: Springer Nature journal article supplement (https://www.springermedizin.de/resource/supplementary/13005_2014_340_MOESM3_ESM.pdf/9625984)

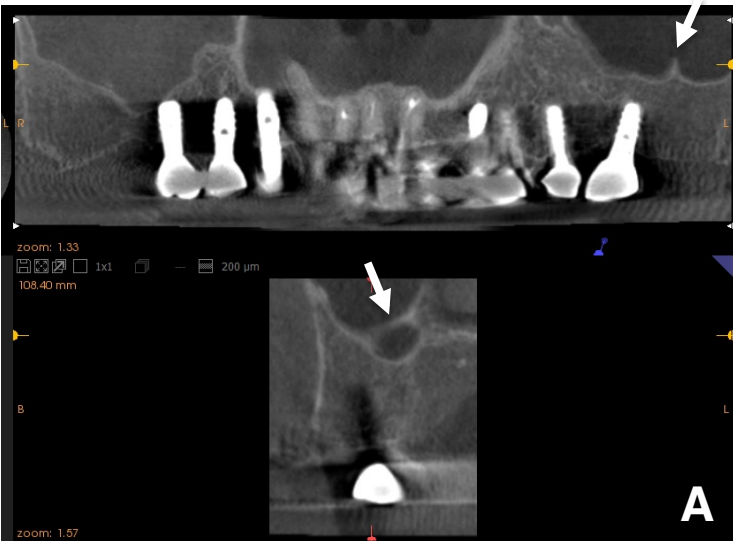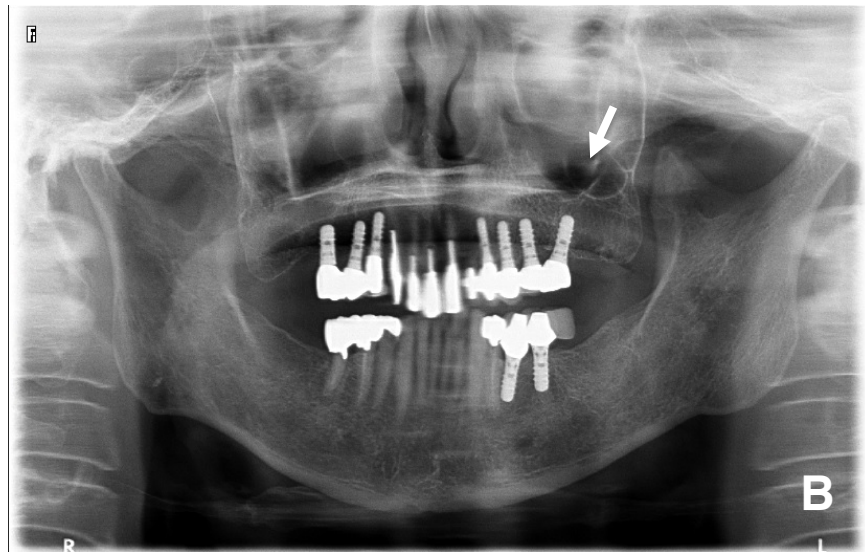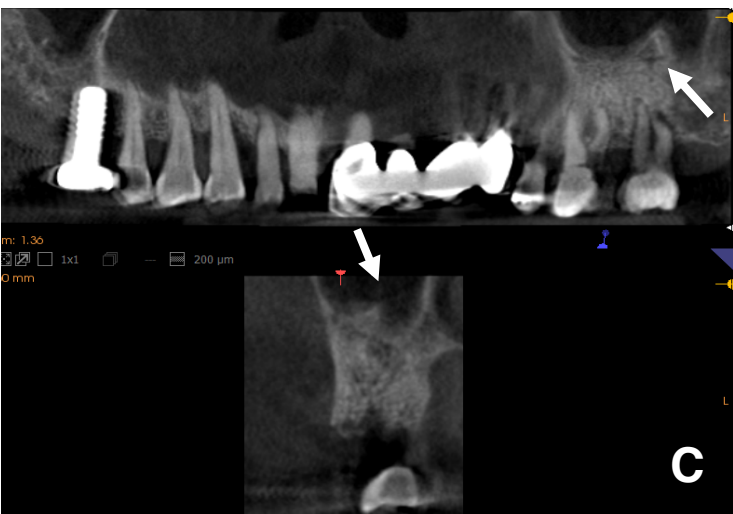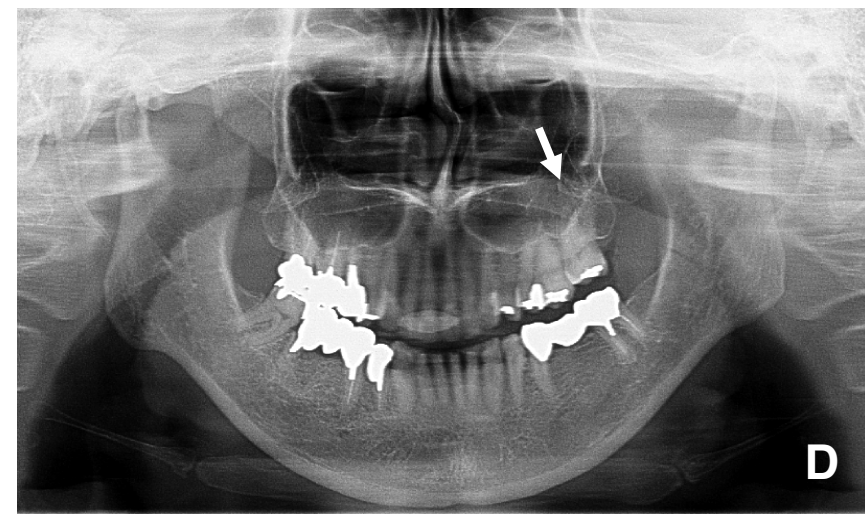

Supplement: MOESM3 [file 9625984]
